# Supplementary material
Source: PubMed Central journal article supplement (PMC10863441)
Supplement: pt3c00297_si_001.pdf [file pt3c00297_si_001.pdf]

**Serotonin-2 receptor agonists produce anti-inflammatory effects through functionally selective mechanisms that involve suppression of disease-induced arginase 1 expression**

Thomas W. Flanagan<sup>1</sup>, Timothy P. Foster<sup>2</sup>, Thomas E. Galbato<sup>2</sup>, Pek Yee Lum<sup>3</sup>, Brent Louie<sup>3</sup>, Gavin Song<sup>3</sup>, Adam L. Halberstadt<sup>4</sup>, Gerald B. Billac<sup>1</sup>, and Charles D. Nichols<sup>1\*</sup>

\* Corresponding Author: [cnich1@lsuhsc.edu](mailto:cnich1@lsuhsc.edu)

1. Department of Pharmacology and Experimental Therapeutics  
Louisiana State University Health Sciences Center  
New Orleans, LA 70112
2. Department of Microbiology, Immunology, and Parasitology  
Louisiana State University Health Sciences Center  
New Orleans, LA 70112
3. Auransa Inc.  
Palo Alto, CA 94301
4. Department of Psychiatry  
University of San Diego, California  
San Diego, CA 92093

A)

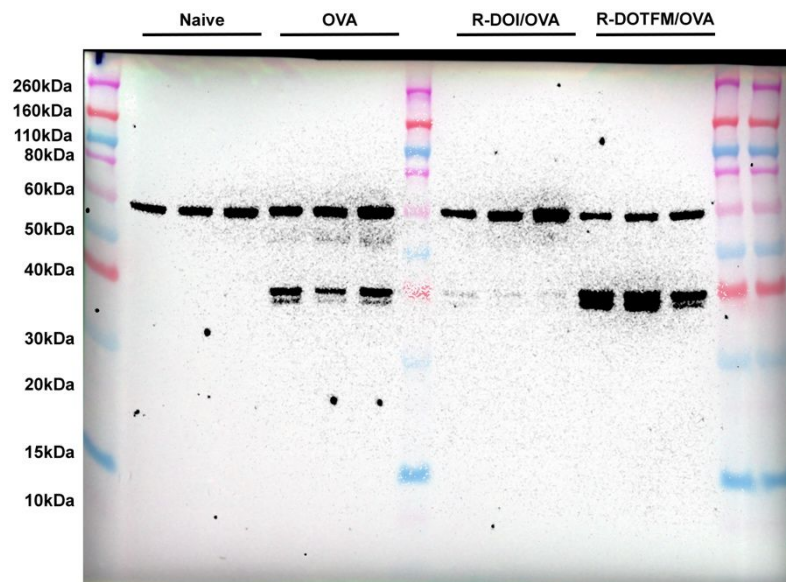

B)

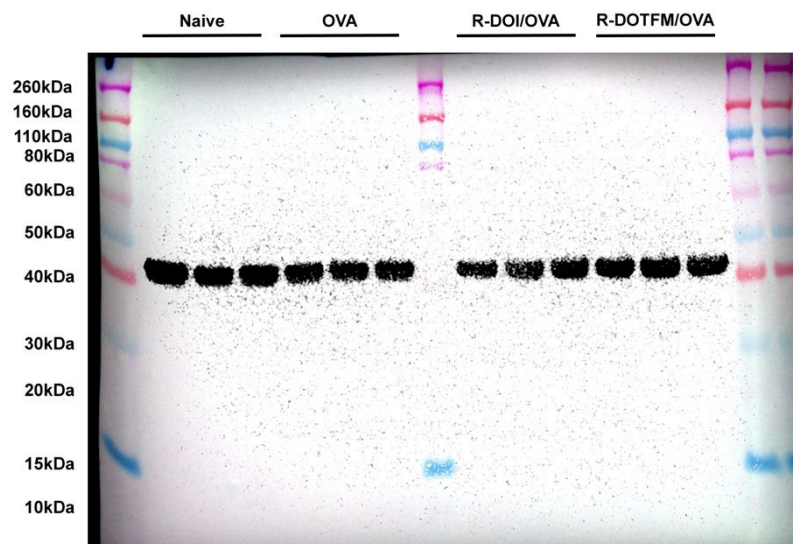

**Figure S1.** Whole gel western blots utilized to quantify arginase 1 expression relative to beta-actin expression. A) Blot was probed as described in the methods section with antibodies against arginase 1 (37 kDa band). B) Blot was stripped and re-probed with antibodies against beta-actin (42 kDa band). Treatment groups are indicated at the top of each image, and the size of the molecular weight standards indicated at the left of each image.
